# Supplementary material for: Neither T-helper type 2 nor Foxp3+regulatory T cells are necessary for therapeutic benefit of atorvastatin in treatment of central nervous system autoimmunity
Source: Springer Nature journal article supplement (doi:10.1186/1742-2094-11-29), 2014-02-06

a)

4h preincubation, 5  $\mu$ M AT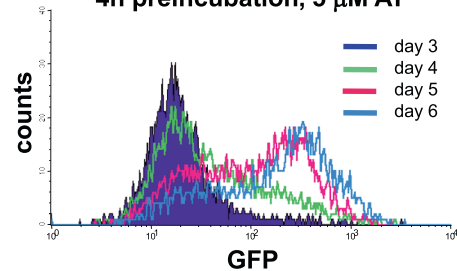

b)

continuous incubation, 5  $\mu$ M AT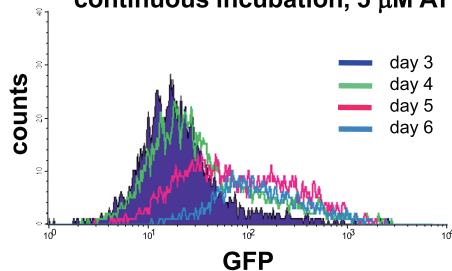

c)

4h preincubation, day 5

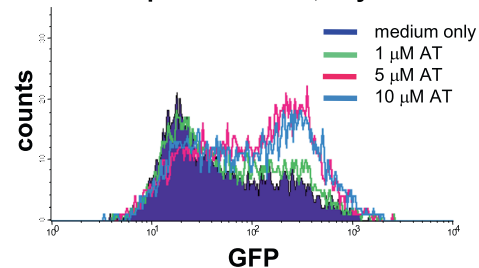

d)

continuous incubation, day 5

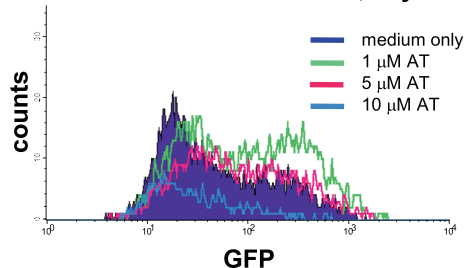1  $\mu$ M AT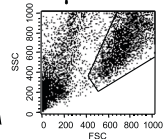5  $\mu$ M AT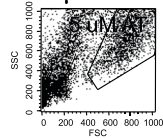10  $\mu$ M AT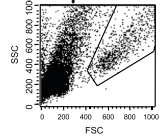

Supplement: 12974_2013_944_MOESM2_ESM.pdf [file 12974_2013_944_MOESM2_ESM.pdf]
