# Supplementary figures and images for: Neither T-helper type 2 nor Foxp3+regulatory T cells are necessary for therapeutic benefit of atorvastatin in treatment of central nervous system autoimmunity
Source: Springer Nature journal article supplement (doi:10.1186/1742-2094-11-29), 2014-02-06

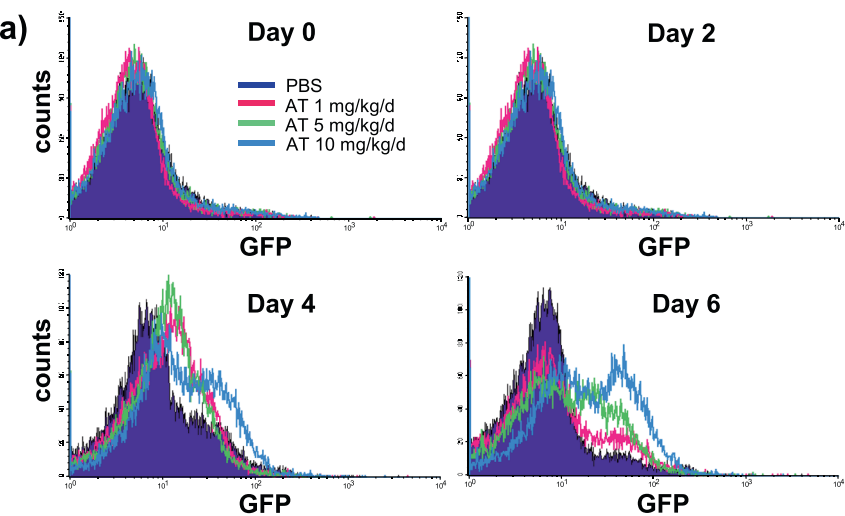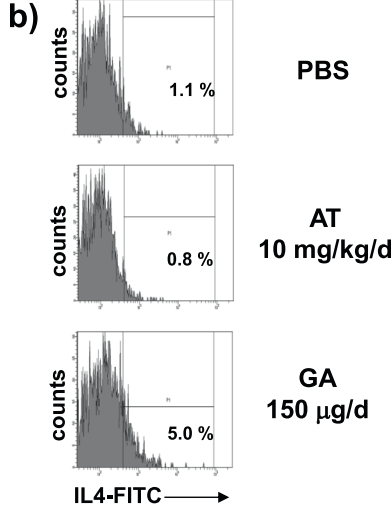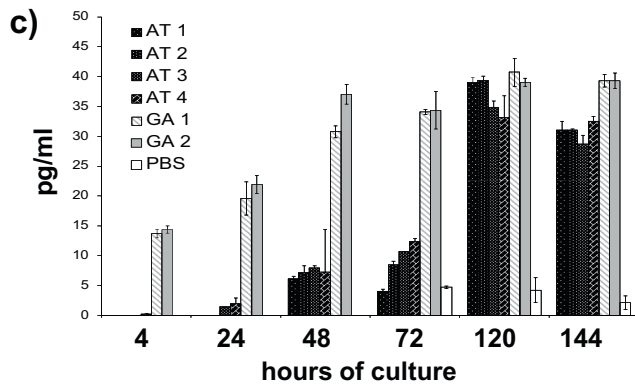

Supplement: 12974_2013_944_MOESM3_ESM.pdf [file 12974_2013_944_MOESM3_ESM.pdf]

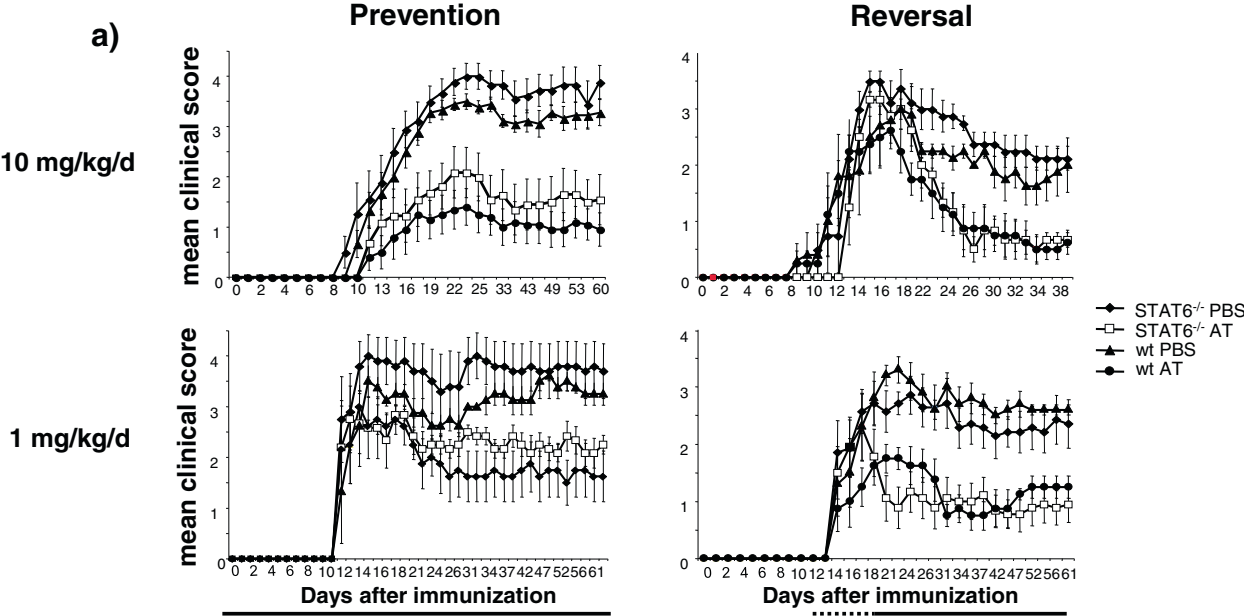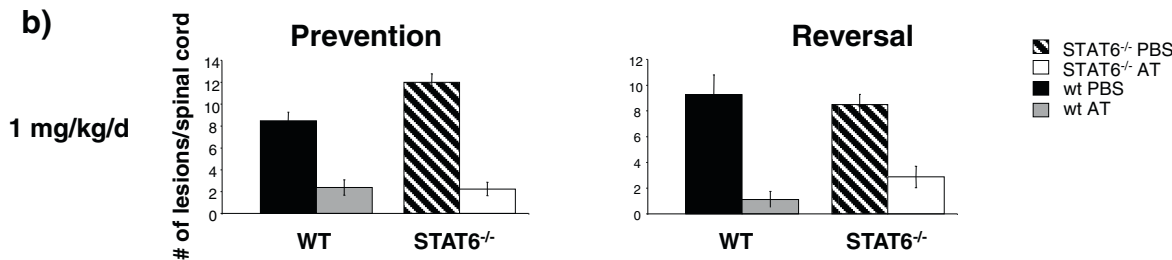

Supplement: 12974_2013_944_MOESM4_ESM.pdf [file 12974_2013_944_MOESM4_ESM.pdf]

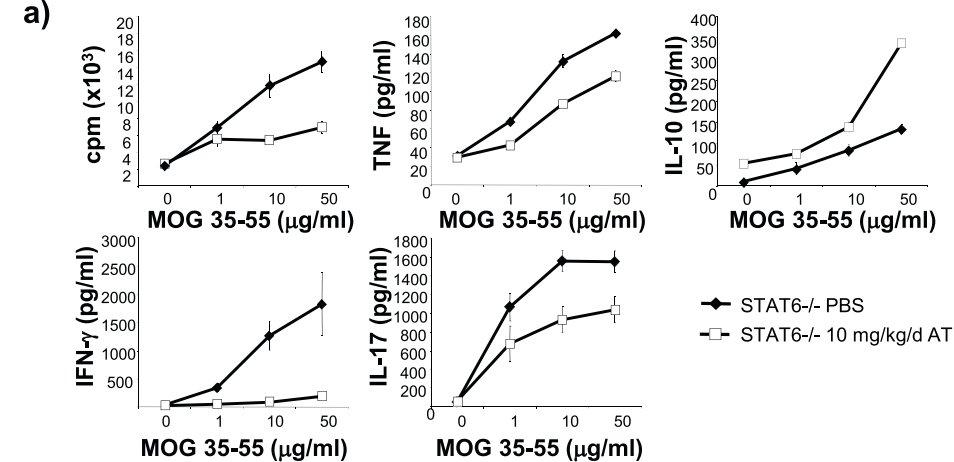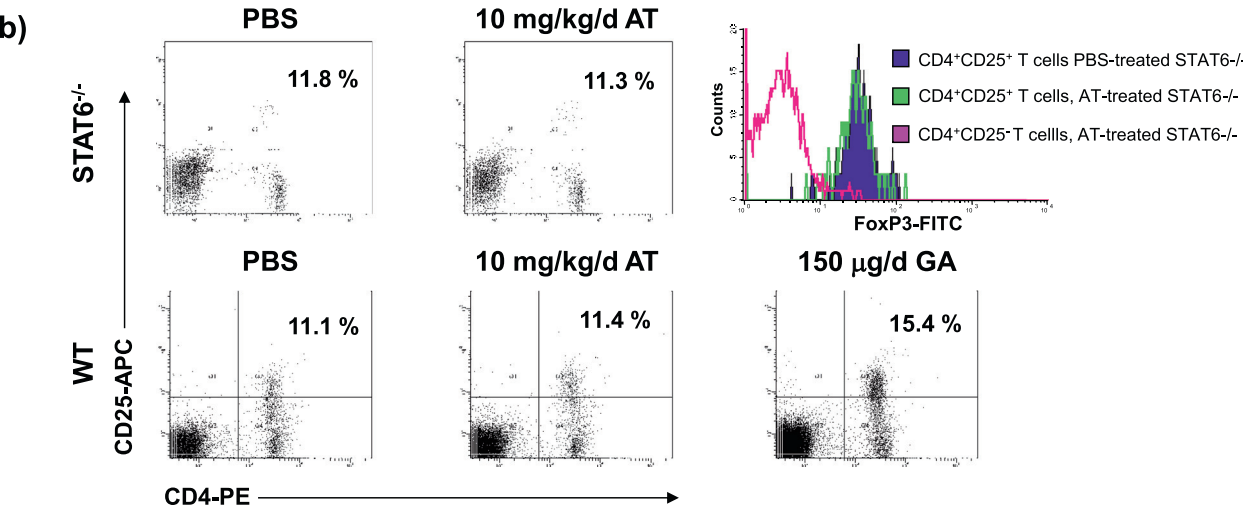

Supplement: 12974_2013_944_MOESM5_ESM.pdf [file 12974_2013_944_MOESM5_ESM.pdf]

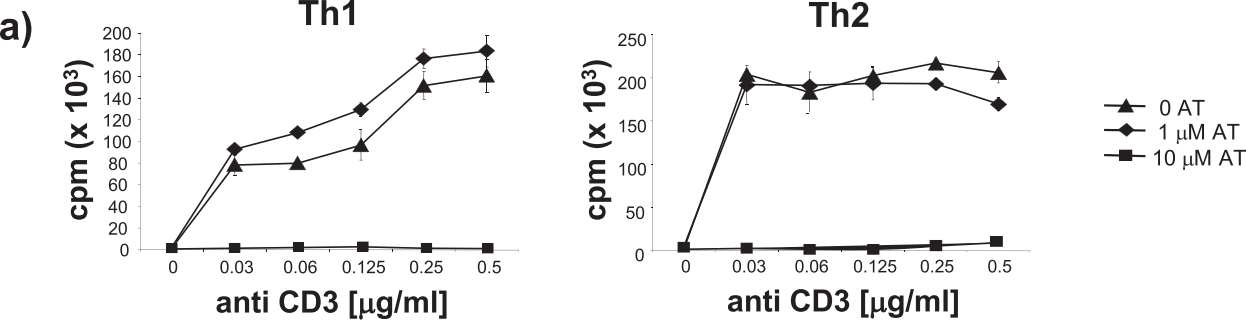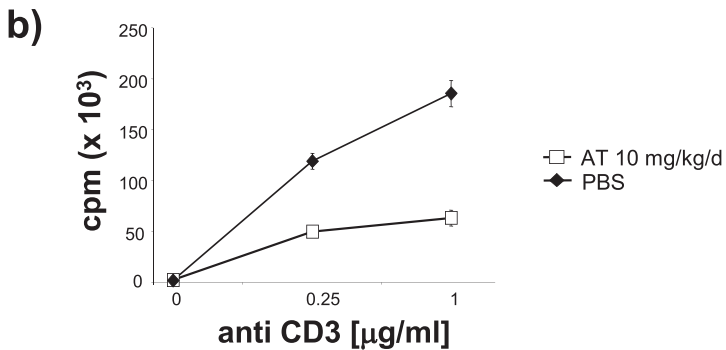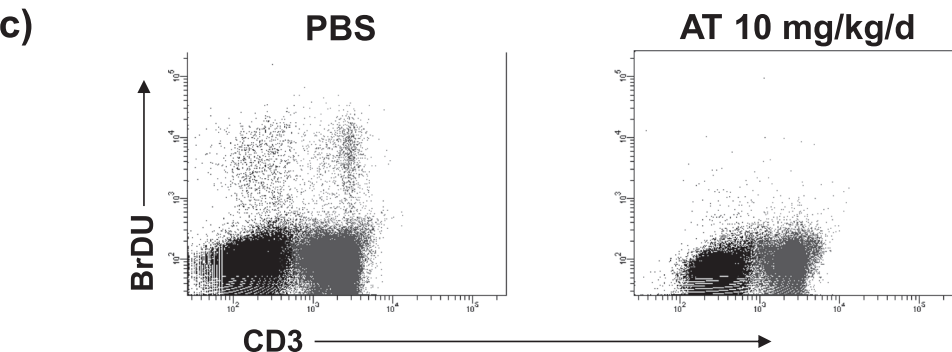

Supplement: 12974_2013_944_MOESM6_ESM.pdf [file 12974_2013_944_MOESM6_ESM.pdf]
